# Supplementary material for: Multi‐Targeting DKK1 and LRP6 Prevents Bone Loss and Improves Fracture Resistance in Multiple Myeloma
Source: PubMed Central journal article supplement (PMC10947379; doi:10.1002/jbmr.4809), 2023-05-25

1 **Multi-targeting DKK1 and LRP6 Prevents Bone Loss and Improves Fracture Resistance in Multiple**  
2 **Myeloma**

3  
4

5 Marija K. Simic<sup>1,2</sup>, Sindhu T. Mohanty<sup>1</sup>, Ya Xiao<sup>1</sup>, Tegan L. Cheng<sup>3</sup>, Victoria E. Taylor<sup>1</sup>, Olga Charlat<sup>4</sup>, Michael  
6 Daley<sup>4</sup>, Peter I. Croucher<sup>1,2</sup>, Michelle M. McDonald<sup>1,2,5</sup>

7  
8

- 9 1. Skeletal Diseases Program, Garvan Institute of Medical Research, Darlinghurst, NSW Australia  
10 2. St Vincent's Clinical Campus, School of Clinical Medicine, University of New South Wales, Kensington  
11 NSW Australia  
12 3. Centre for Children's Bone and Musculoskeletal Health, The Children's Hospital at Westmead,  
13 Westmead NSW Australia  
14 4. Novartis Institutes for Biomedical Research, Cambridge MA, USA  
15 5. School of Medical Science, Faculty of Medicine and Health, The University of Sydney, NSW Australia

16  
17

18 Corresponding author:  
19 Michelle M. McDonald, Ph.D  
20 Skeletal Diseases Program  
21 Garvan Institute of Medical Research  
22 384 Victoria Street  
23 Darlinghurst NSW 2010  
24 Tel: +612 9295 8247  
25 Email: [m.mcdonald@garvan.org.au](mailto:m.mcdonald@garvan.org.au)

26  
27

Running title: Wnt Stimulation in Myeloma Bone Disease

28  
29

Keywords: Wnt, LRP6, DKK1, myeloma, bone

30

31 **SUPPLEMENTARY FIGURE LEGENDS**

32

33 **Supplementary figure 1. Circulating levels of OPG and RANKL in response to anti-LRP6 antibody**  
34 **treatment in naïve mice.** Systemic expression of **(A)** OPG, **(B)** RANKL and **(C)** RANKL/OPG in naïve mice  
35 treated with anti-LRP6 Ab or isotype for 7 and 14 days. Results plotted as mean  $\pm$  SD.

36

37 **Supplementary figure 2. Anti-LRP6 antibody prevented trabecular bone loss in a separate cohort of**  
38 **5TGM1-bearing mice.** MicroCT-derived (i) trabecular bone volume fraction (BV/TV, %), (ii) trabecular  
39 thickness (Tb.Th, mm), and (iii) trabecular number (Tb.N, N/mm) in the distal femoral metaphysis **(A)** and  
40 L4 lumbar vertebrae **(B)** in all respective groups in repeated 5TGM1-bearing mice treated with anti-LRP6  
41 AB alone or isotype for 21 days. Results plotted as mean  $\pm$  SD.

42

43 **Supplementary figure 3. Anti-DKK1 antibody prevented trabecular bone loss in 5TGM1-bearing mice.**  
44 MicroCT-derived (i) trabecular bone volume fraction (BV/TV, %), (ii) trabecular thickness (Tb.Th, mm), (iii),  
45 trabecular number (Tb.N, N/mm), (iv) cortical bone volume (Ct.BV, mm<sup>3</sup>) and (v) cortical thickness (Ct.Th,  
46 mm) in the distal femoral metaphysis **(A)** and L4 lumbar vertebrae **(B)** of naïve and 5TGM1-bearing mice  
47 treated with anti-DKK1 Ab alone or isotype for 21 days. Results plotted as mean  $\pm$  SD.

48

49 **Supplementary figure 4. Anti-LRP6/DKK1 combination strategy led to significant elevations in bone**  
50 **volume in naïve mice. (A)** MicroCT-derived (i) trabecular bone volume fraction (BV/TV, %), (ii) trabecular  
51 thickness (Tb.Th, mm), (iii) trabecular number (Tb.N, N/mm), (iv) cortical bone volume (Ct.BV, mm<sup>3</sup>) and  
52 (v) cortical thickness (Ct.Th, mm) in the distal femoral metaphysis. (i) Mineral apposition rate (MAR,  
53  $\mu\text{m}/\text{day}$ ), mineralising surface (MS/BS, %) and (iii) bone formation rate (BFR,  $\mu\text{m}^3/\mu\text{m}^2/\text{day}$ ) measured on  
54 trabecular **(B)** and endocortical bone **(C)** surfaces within femora of naïve mice treated with anti-  
55 LRP6/DKK1 Ab combination or isotype for 21 days. Results plotted as mean  $\pm$  SD.

56

Supplementary figure 1.

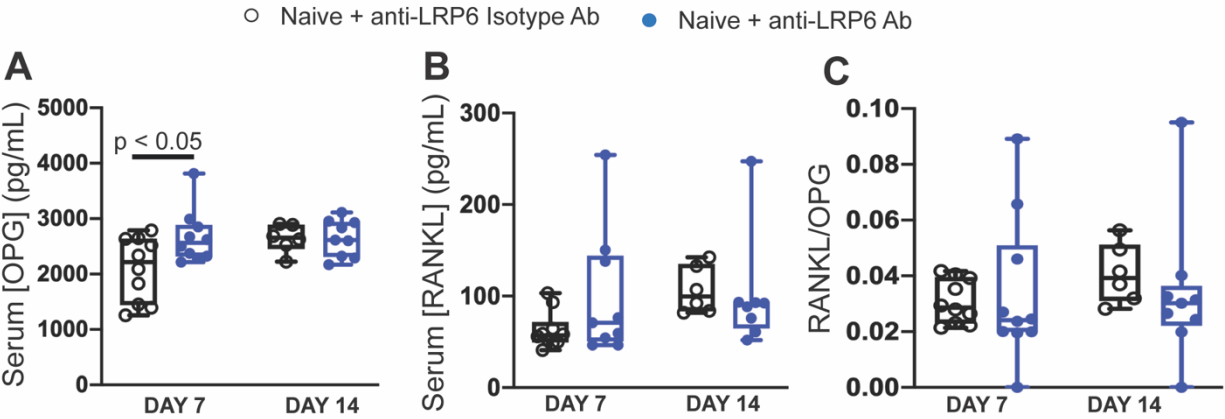

Supplementary figure 2.

○ Naive + anti-LRP6 Isotype    □ 5TGM1 + anti-LRP6 Isotype  
 ● Naive + anti-LRP6 Ab        ■ 5TGM1 + anti-LRP6 Ab

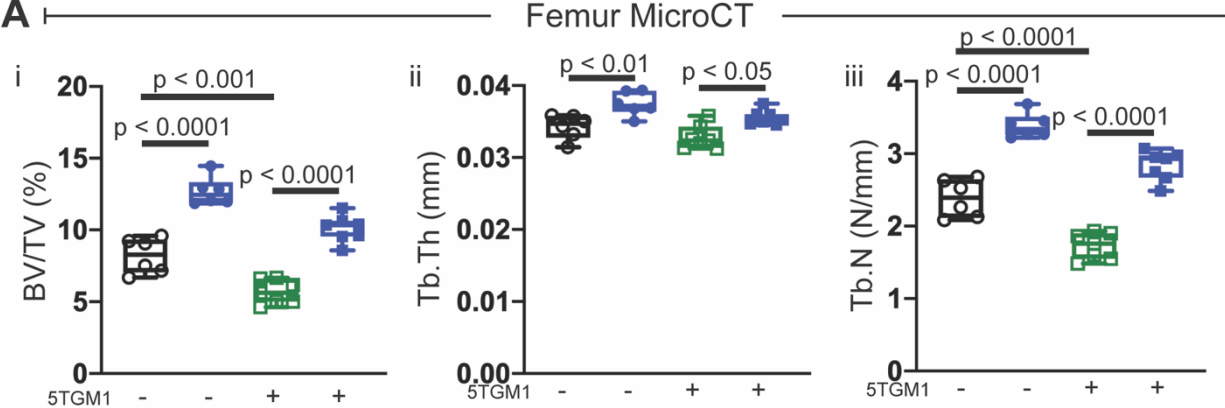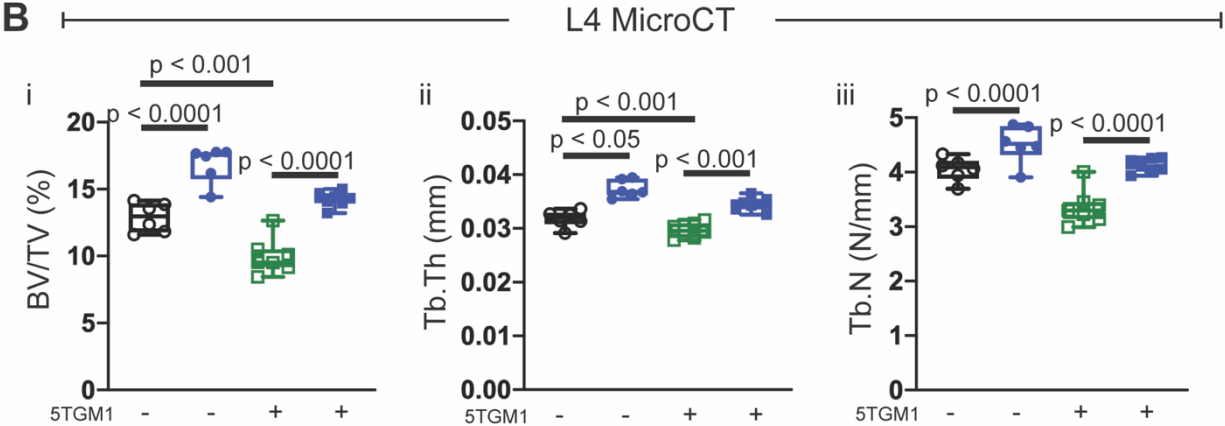

Supplementary figure 3.

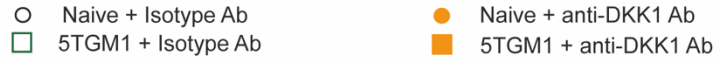

**A** Femur MicroCT

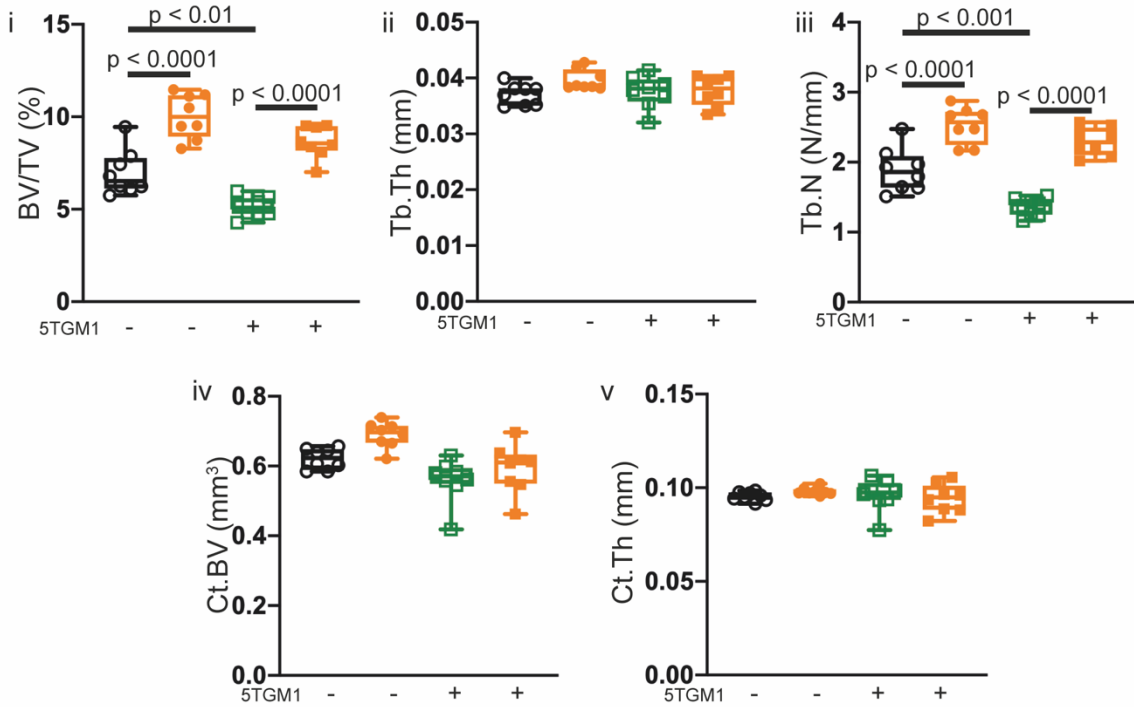

**B** L4 MicroCT

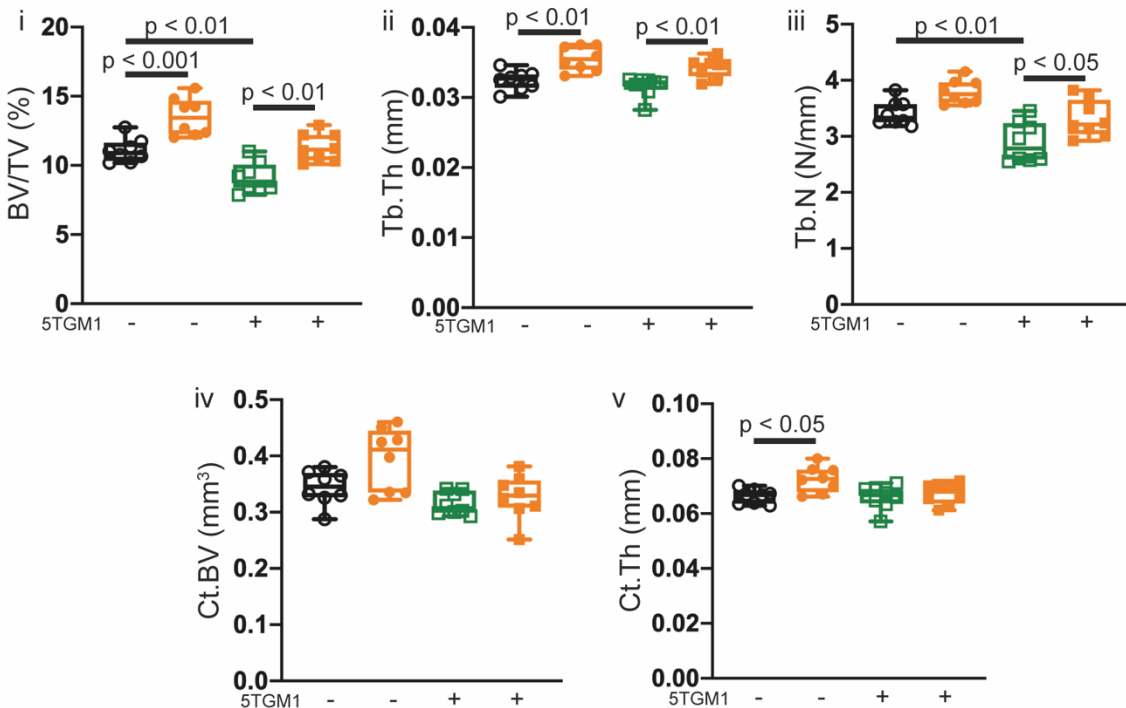

## Supplementary figure 4

○ Naive + anti-LRP6/DKK1 Isotype      ● Naive + anti-LRP6/DKK1 Ab

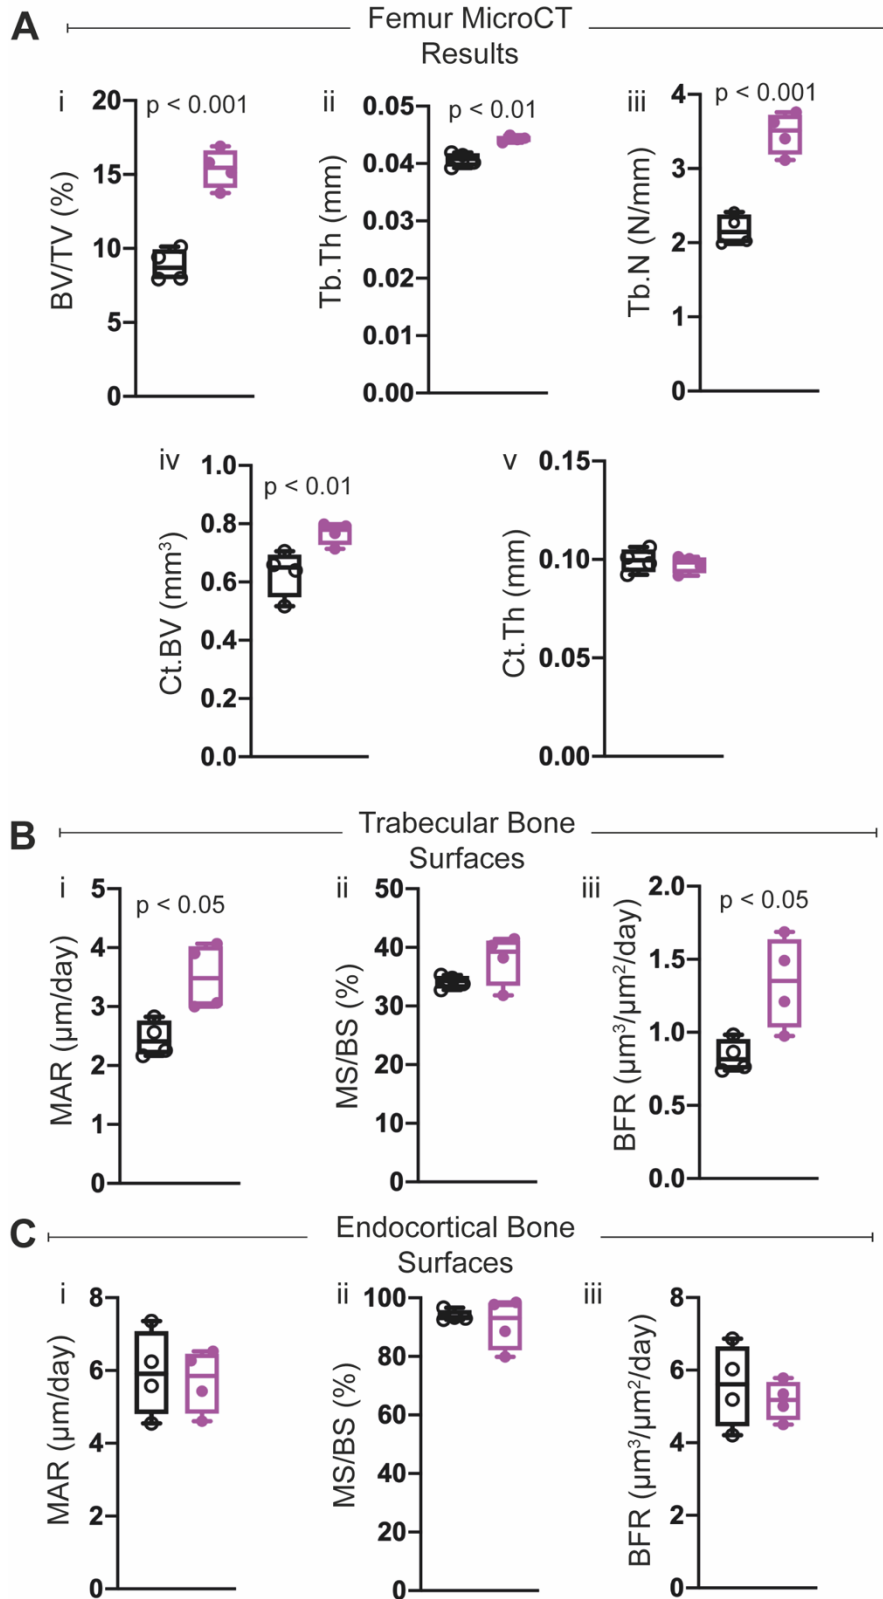

Supplement: JBMR-38-814-s001.pdf [file JBMR-38-814-s001.pdf]
